# Supplementary material for: Atomic layer deposition of Ru nanoclusters on Ba–LaCeOx: a highly efficient catalyst for ammonia synthesis under mild conditions
Source: Royal Society of Chemistry journal article supplement (doi:10.1039/d4su00350k), 2024-01-01
Supplement: d4su00350k1.pdf [file d4su00350k1.pdf]

## Supporting Information

### **Atomic Layer Deposition of Ru Nanoclusters on Ba-LaCeO<sub>x</sub>: A Highly Efficient Catalyst for Ammonia Synthesis under Mild Conditions**

Kaiying Wang <sup>a, 1</sup>, Baitang Jin <sup>b, 1</sup>, Xiaoqing He <sup>c, d</sup>, and Xinhua Liang <sup>a, b, \*</sup>

<sup>a</sup> *Department of Energy, Environmental & Chemical Engineering, Washington University in St. Louis, St. Louis, Missouri, 63130, United States*

<sup>b</sup> *Linda and Bipin Doshi Department of Chemical and Biochemical Engineering, Missouri University of Science and Technology, Rolla, Missouri 65409, United States*

<sup>c</sup> *Electron Microscopy Core Facility, University of Missouri, Columbia, Missouri 65211, United States*

<sup>d</sup> *Department of Mechanical and Aerospace Engineering, University of Missouri, Columbia, Missouri 65211, United States*

<sup>1</sup> *equal contribution to this work.*

\* Corresponding author. Email: [Xinhua.Liang@wustl.edu](mailto:Xinhua.Liang@wustl.edu)

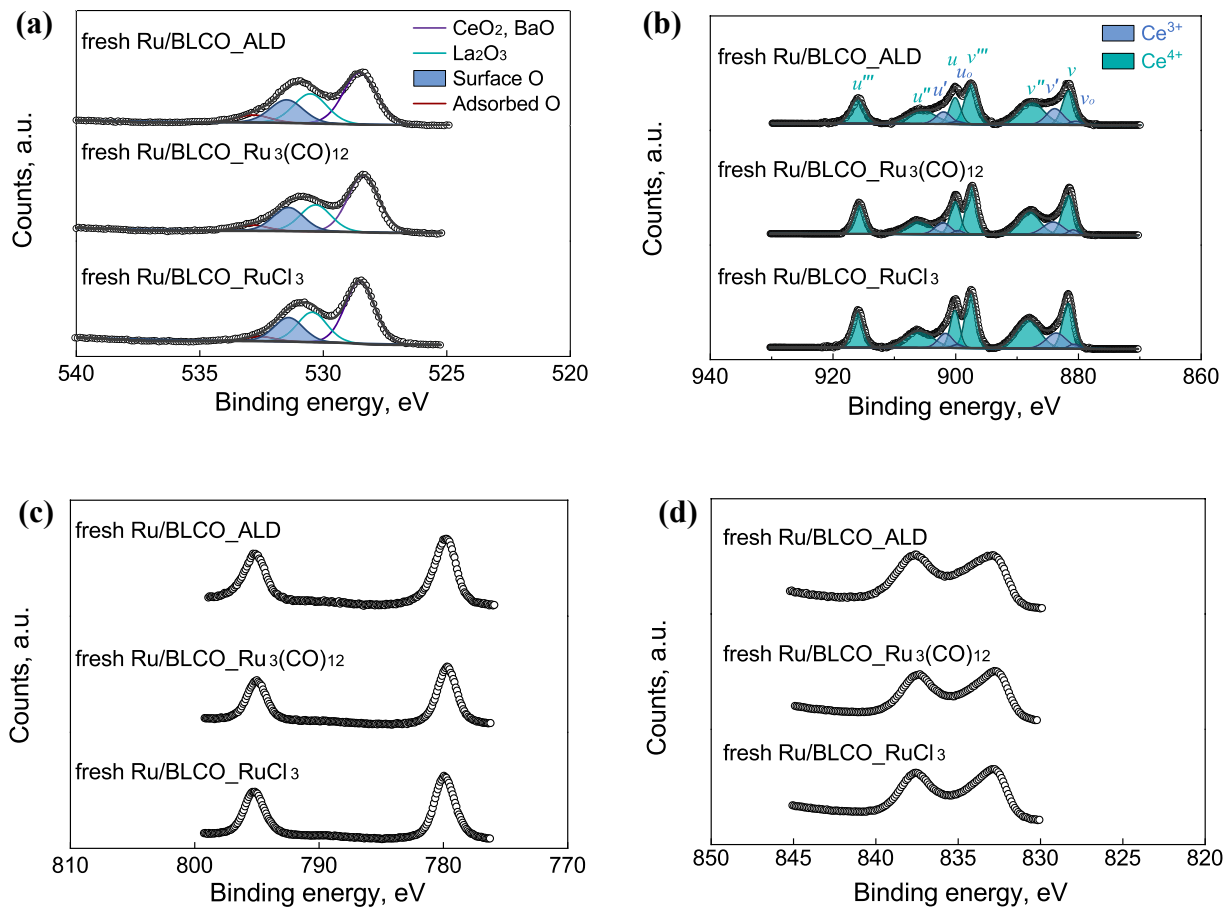

Figure S1. XPS spectra of (a) C 1s, (b) Ce 3d, (c) Ba 3d, and (d) La 3d<sub>5/2</sub> for the fresh Ru/BLCO\_ALD, fresh Ru/BLCO\_Ru<sub>3</sub>(CO)<sub>12</sub>, and fresh Ru/BLCO\_RuCl<sub>3</sub> catalysts.

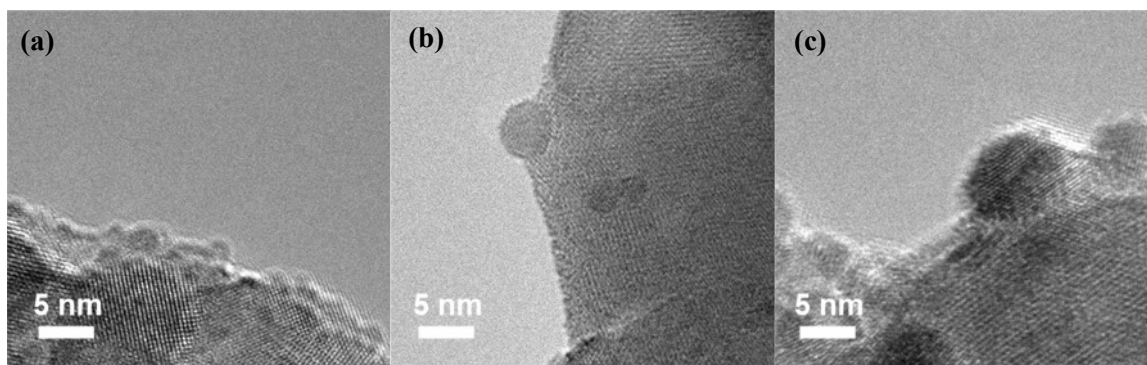

Figure S2. TEM images of (a) reduced Ru/BLCO\_ALD, (b) reduced Ru/BLCO\_Ru<sub>3</sub>(CO)<sub>12</sub>, and (c) reduced Ru/BLCO\_RuCl<sub>3</sub> catalysts.

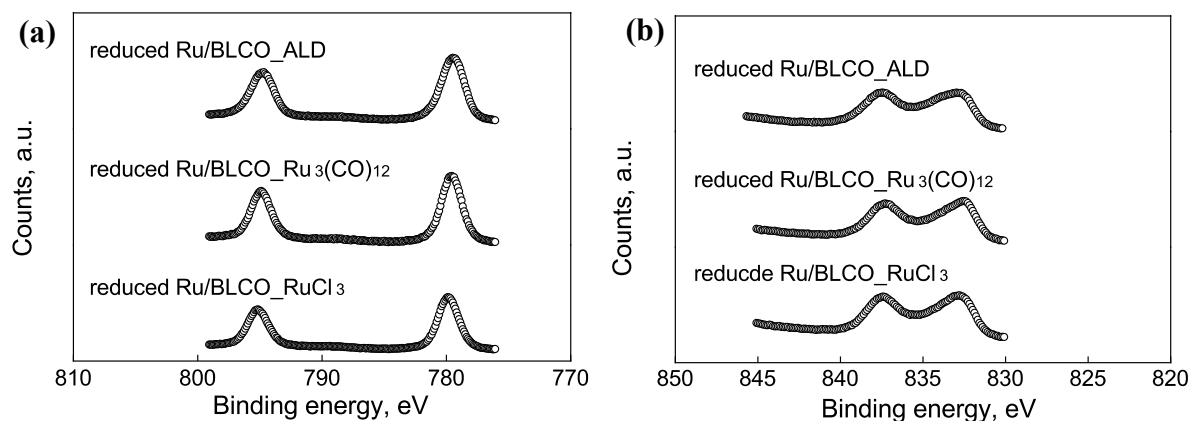

Figure S3. XPS spectra of (a) Ba 3d, and (b) La 3d<sub>5/2</sub> for the reduced Ru/BLCO\_ALD, reduced Ru/BLCO\_Ru<sub>3</sub>(CO)<sub>12</sub>, and reduced Ru/BLCO\_RuCl<sub>3</sub> catalysts.

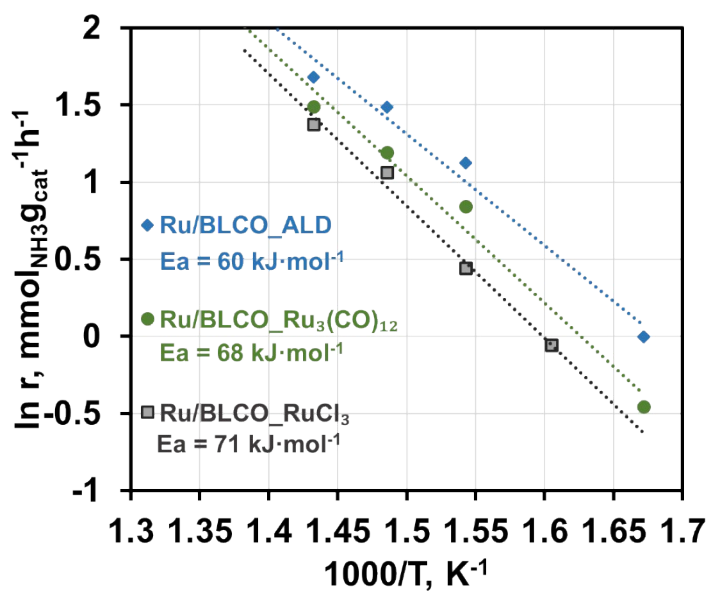

Figure S4. Arrhenius plots for ammonia synthesis reactions at 1.0 MPa and 6,000 mL·g<sub>cat</sub><sup>-1</sup>·h<sup>-1</sup> over Ru/BLCO\_ALD, Ru/BLCO\_Ru<sub>3</sub>(CO)<sub>12</sub>, and Ru/BLCO\_RuCl<sub>3</sub> catalysts.

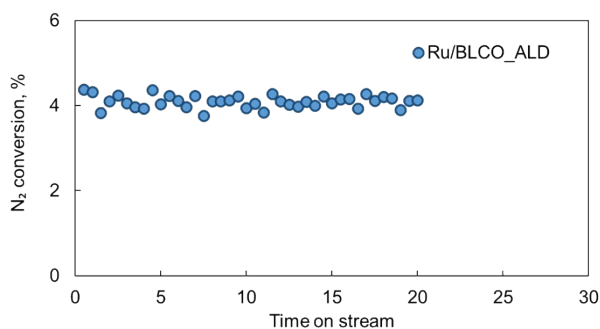

Figure S5. Second cycle stability test of Ru/BLCO\_ALD for ammonia synthesis under conditions of 350°C, 4.2 MPa, and 6,000 mL gcat<sup>-1</sup>h<sup>-1</sup>.

Table S1. Atomic composition results of different catalysts based on XPS.

| Catalyst                                           | Element, atom % |      |       |      |      |       | Ce/Ru | Ba/Ru |
|----------------------------------------------------|-----------------|------|-------|------|------|-------|-------|-------|
|                                                    | Ba              | La   | C     | Ce   | Ru   | O     |       |       |
| Fresh Ru/BLCO_ALD                                  | 3.76            | 6.60 | 39.77 | 4.82 | 2.27 | 42.78 | 2.1   | 1.66  |
| Reduced Ru/BLCO_ALD                                | 3.96            | 6.92 | 40.35 | 4.97 | 1.77 | 42.03 | 2.8   | 2.24  |
| Fresh Ru/BLCO_Ru <sub>3</sub> (CO) <sub>12</sub>   | 3.63            | 6.39 | 49.56 | 4.51 | 1.84 | 34.07 | 2.5   | 1.97  |
| Reduced Ru/BLCO_Ru <sub>3</sub> (CO) <sub>12</sub> | 3.87            | 7.52 | 31.29 | 4.88 | 1.71 | 50.73 | 2.9   | 2.26  |
| Fresh Ru/BLCO_RuCl <sub>3</sub>                    | 2.84            | 6.93 | 37.06 | 4.63 | 1.97 | 46.57 | 2.4   | 1.44  |
| Reduced Ru/BLCO_RuCl <sub>3</sub>                  | 3.29            | 5.85 | 34.94 | 4.96 | 1.53 | 49.43 | 3.2   | 2.15  |

Table S2. Relative atomic concentrations of Ru and RuO<sub>2</sub> based on C 1s + Ru 3d and Ru 3p XPS peak deconvolution.

| Catalyst                                           | Based on C 1s+ Ru 3d |                    | Based on Ru 3p |                    |
|----------------------------------------------------|----------------------|--------------------|----------------|--------------------|
|                                                    | Ru%                  | RuO <sub>2</sub> % | Ru%            | RuO <sub>2</sub> % |
| Fresh Ru/BLCO_ALD                                  | 72.3                 | 27.7               | 74.2           | 24.8               |
| Reduced Ru/BLCO_ALD                                | 76.8                 | 23.2               | 77.1           | 22.9               |
| Fresh Ru/BLCO_Ru <sub>3</sub> (CO) <sub>12</sub>   | -                    | 100                | -              | 100                |
| Reduced Ru/BLCO_Ru <sub>3</sub> (CO) <sub>12</sub> | 81.3                 | 18.7               | 83.5           | 16.5               |
| Fresh Ru/BLCO_RuCl <sub>3</sub>                    | -                    | 100                | -              | 100                |
| Reduced Ru/BLCO_RuCl <sub>3</sub>                  | 87.8                 | 12.2               | 87.1           | 12.9               |
